# Supplementary material
Source: publisher site journal article supplement (https://www.kjim.org/upload/media/kjim-2025-171-Supplementary-Table-10.pdf)
Supplement: Supplementary file 1 [file kjim-2025-171-Supplementary-Table-10.pdf]

**Supplementary Table 10. Stratification analysis of the incident risk of cholecystitis and cholangitis following zoster vaccination in the propensity score-matched cohort**

| Cholecystitis, cholangitis           | Events, n (%) | Incidence rate <sup>b)</sup> | aHR (95% CI)                      |                                   |
|--------------------------------------|---------------|------------------------------|-----------------------------------|-----------------------------------|
|                                      |               |                              | Model 1 <sup>c)</sup>             | Model 2 <sup>d)</sup>             |
| Sex                                  |               |                              |                                   |                                   |
| Male                                 |               |                              |                                   |                                   |
| Unvaccinated                         | 4,292 (1.35)  | 1.05                         | 1.0 (reference)                   | 1.0 (reference)                   |
| Vaccinated                           | 3,079 (0.96)  | 0.83                         | 0.77 (0.74 to 0.81) <sup>e)</sup> | 0.76 (0.73 to 0.80) <sup>e)</sup> |
| Female                               |               |                              |                                   |                                   |
| Unvaccinated                         | 4,884 (1.18)  | 1.19                         | 1.0 (reference)                   | 1.0 (reference)                   |
| Vaccinated                           | 4,118 (1.01)  | 1.12                         | 0.88 (0.85 to 0.92) <sup>e)</sup> | 0.87 (0.84 to 0.91) <sup>e)</sup> |
| Age (yr)                             |               |                              |                                   |                                   |
| < 60                                 |               |                              |                                   |                                   |
| Unvaccinated                         | 3,338 (1.72)  | 0.82                         | 1.0 (reference)                   | 1.0 (reference)                   |
| Vaccinated                           | 2,417 (1.23)  | 0.66                         | 0.75 (0.71 to 0.79) <sup>e)</sup> | 0.74 (0.70 to 0.78) <sup>e)</sup> |
| ≥ 60                                 |               |                              |                                   |                                   |
| Unvaccinated                         | 5,838 (1.09)  | 1.43                         | 1.0 (reference)                   | 1.0 (reference)                   |
| Vaccinated                           | 4,780 (0.89)  | 1.30                         | 0.88 (0.85 to 0.91) <sup>e)</sup> | 0.87 (0.84 to 0.91) <sup>e)</sup> |
| Region of residence                  |               |                              |                                   |                                   |
| Urban                                |               |                              |                                   |                                   |
| Unvaccinated                         | 4,247 (1.25)  | 1.04                         | 1.0 (reference)                   | 1.0 (reference)                   |
| Vaccinated                           | 3,400 (1.00)  | 0.92                         | 0.84 (0.80 to 0.88) <sup>e)</sup> | 0.83 (0.80 to 0.87) <sup>e)</sup> |
| Rural                                |               |                              |                                   |                                   |
| Unvaccinated                         | 4,929 (1.26)  | 1.20                         | 1.0 (reference)                   | 1.0 (reference)                   |
| Vaccinated                           | 3,797 (0.97)  | 1.03                         | 0.82 (0.79 to 0.86) <sup>e)</sup> | 0.82 (0.78 to 0.85) <sup>e)</sup> |
| Household income                     |               |                              |                                   |                                   |
| Low (0th–39th percentile)            |               |                              |                                   |                                   |
| Unvaccinated                         | 2,703 (1.28)  | 0.66                         | 1.0 (reference)                   | 1.0 (reference)                   |
| Vaccinated                           | 2,046 (0.97)  | 0.55                         | 0.81 (0.77 to 0.86) <sup>e)</sup> | 0.81 (0.76 to 0.85) <sup>e)</sup> |
| Middle (40th–79th percentile)        |               |                              |                                   |                                   |
| Unvaccinated                         | 3,297 (1.25)  | 0.81                         | 1.0 (reference)                   | 1.0 (reference)                   |
| Vaccinated                           | 2,597 (0.99)  | 0.70                         | 0.85 (0.81 to 0.90) <sup>e)</sup> | 0.84 (0.80 to 0.89) <sup>e)</sup> |
| High (80th–100th percentile)         |               |                              |                                   |                                   |
| Unvaccinated                         | 3,176 (1.24)  | 0.78                         | 1.0 (reference)                   | 1.0 (reference)                   |
| Vaccinated                           | 2,554 (0.99)  | 0.69                         | 0.83 (0.79 to 0.87) <sup>e)</sup> | 0.82 (0.78 to 0.87) <sup>e)</sup> |
| Body mass index (kg/m <sup>2</sup> ) |               |                              |                                   |                                   |
| < 23.0                               |               |                              |                                   |                                   |
| Unvaccinated                         | 2,355 (1.23)  | 0.58                         | 1.0 (reference)                   | 1.0 (reference)                   |
| Vaccinated                           | 1,967 (1.03)  | 0.53                         | 0.88 (0.83 to 0.93) <sup>e)</sup> | 0.87 (0.82 to 0.92) <sup>e)</sup> |
| 23.0–24.9                            |               |                              |                                   |                                   |
| Unvaccinated                         | 2,499 (1.25)  | 0.61                         | 1.0 (reference)                   | 1.0 (reference)                   |
| Vaccinated                           | 1,911 (0.96)  | 0.52                         | 0.82 (0.77 to 0.87) <sup>e)</sup> | 0.81 (0.76 to 0.86) <sup>e)</sup> |
| ≥ 25.0                               |               |                              |                                   |                                   |
| Unvaccinated                         | 4,322 (1.27)  | 1.06                         | 1.0 (reference)                   | 1.0 (reference)                   |
| Vaccinated                           | 3,319 (0.97)  | 0.90                         | 0.81 (0.77 to 0.85) <sup>e)</sup> | 0.80 (0.77 to 0.84) <sup>e)</sup> |

Supplementary Table 10. Continued

| Cholecystitis, cholangitis                 | Events, n (%) | Incidence rate <sup>b)</sup> | aHR (95% CI)                      |                                   |
|--------------------------------------------|---------------|------------------------------|-----------------------------------|-----------------------------------|
|                                            |               |                              | Model 1 <sup>c)</sup>             | Model 2 <sup>d)</sup>             |
| Smoking status <sup>a)</sup>               |               |                              |                                   |                                   |
| Non-smoker                                 |               |                              |                                   |                                   |
| Unvaccinated                               | 6,063 (1.20)  | 1.48                         | 1.0 (reference)                   | 1.0 (reference)                   |
| Vaccinated                                 | 4,873 (0.97)  | 1.32                         | 0.85 (0.82 to 0.88) <sup>e)</sup> | 0.84 (0.81 to 0.88) <sup>e)</sup> |
| Smoker                                     |               |                              |                                   |                                   |
| Unvaccinated                               | 3,113 (1.38)  | 0.76                         | 1.0 (reference)                   | 1.0 (reference)                   |
| Vaccinated                                 | 2,324 (1.01)  | 0.63                         | 0.79 (0.75 to 0.83) <sup>e)</sup> | 0.78 (0.74 to 0.83) <sup>e)</sup> |
| Alcohol consumption (day per week)         |               |                              |                                   |                                   |
| < 1                                        |               |                              |                                   |                                   |
| Unvaccinated                               | 4,068 (1.00)  | 0.99                         | 1.0 (reference)                   | 1.0 (reference)                   |
| Vaccinated                                 | 2,931 (0.73)  | 0.79                         | 0.77 (0.73 to 0.81) <sup>e)</sup> | 0.77 (0.73 to 0.80) <sup>e)</sup> |
| 1–4                                        |               |                              |                                   |                                   |
| Unvaccinated                               | 4,900 (1.56)  | 1.20                         | 1.0 (reference)                   | 1.0 (reference)                   |
| Vaccinated                                 | 4,106 (1.31)  | 1.11                         | 0.87 (0.84 to 0.91) <sup>e)</sup> | 0.87 (0.83 to 0.90) <sup>e)</sup> |
| ≥ 5                                        |               |                              |                                   |                                   |
| Unvaccinated                               | 208 (1.72)    | 0.051                        | 1.0 (reference)                   | 1.0 (reference)                   |
| Vaccinated                                 | 160 (1.21)    | 0.043                        | 0.77 (0.63 to 0.95) <sup>e)</sup> | 0.76 (0.61 to 0.93) <sup>e)</sup> |
| Physical activity                          |               |                              |                                   |                                   |
| Insufficient physical activity             |               |                              |                                   |                                   |
| Unvaccinated                               | 7,144 (1.27)  | 1.75                         | 1.0 (reference)                   | 1.0 (reference)                   |
| Vaccinated                                 | 5,481 (0.99)  | 1.49                         | 0.82 (0.79 to 0.85) <sup>e)</sup> | 0.81 (0.78 to 0.84) <sup>e)</sup> |
| Sufficient physical activity               |               |                              |                                   |                                   |
| Unvaccinated                               | 2,032 (1.19)  | 0.50                         | 1.0 (reference)                   | 1.0 (reference)                   |
| Vaccinated                                 | 1,716 (0.98)  | 0.47                         | 0.87 (0.82 to 0.93) <sup>e)</sup> | 0.86 (0.81 to 0.92) <sup>e)</sup> |
| Medication use for coronary artery disease |               |                              |                                   |                                   |
| No                                         |               |                              |                                   |                                   |
| Unvaccinated                               | 8,739 (1.24)  | 2.14                         | 1.0 (reference)                   | 1.0 (reference)                   |
| Vaccinated                                 | 6,833 (0.97)  | 1.85                         | 0.83 (0.80 to 0.85) <sup>e)</sup> | 0.82 (0.79 to 0.85) <sup>e)</sup> |
| Yes                                        |               |                              |                                   |                                   |
| Unvaccinated                               | 437 (1.67)    | 0.11                         | 1.0 (reference)                   | 1.0 (reference)                   |
| Vaccinated                                 | 364 (1.41)    | 0.10                         | 0.89 (0.77 to 1.02)               | 0.89 (0.77 to 1.02)               |
| Medication use for hypertension            |               |                              |                                   |                                   |
| No                                         |               |                              |                                   |                                   |
| Unvaccinated                               | 5,950 (1.22)  | 1.45                         | 1.0 (reference)                   | 1.0 (reference)                   |
| Vaccinated                                 | 4,578 (0.96)  | 1.24                         | 0.84 (0.80 to 0.87) <sup>e)</sup> | 0.83 (0.80 to 0.86) <sup>e)</sup> |
| Yes                                        |               |                              |                                   |                                   |
| Unvaccinated                               | 3,226 (1.32)  | 0.79                         | 1.0 (reference)                   | 1.0 (reference)                   |
| Vaccinated                                 | 2,619 (1.04)  | 0.71                         | 0.82 (0.78 to 0.86) <sup>e)</sup> | 0.81 (0.77 to 0.86) <sup>e)</sup> |

Supplementary Table 10. Continued

| Cholecystitis, cholangitis        | Events, n (%) | Incidence rate <sup>b)</sup> | aHR (95% CI)                      |                                   |
|-----------------------------------|---------------|------------------------------|-----------------------------------|-----------------------------------|
|                                   |               |                              | Model 1 <sup>c)</sup>             | Model 2 <sup>d)</sup>             |
| Medication use for diabetes       |               |                              |                                   |                                   |
| No                                |               |                              |                                   |                                   |
| Unvaccinated                      | 7,858 (1.24)  | 1.92                         | 1.0 (reference)                   | 1.0 (reference)                   |
| Vaccinated                        | 6,054 (0.96)  | 1.64                         | 0.83 (0.80 to 0.86) <sup>e)</sup> | 0.82 (0.79 to 0.85) <sup>e)</sup> |
| Yes                               |               |                              |                                   |                                   |
| Unvaccinated                      | 1,318 (1.36)  | 0.32                         | 1.0 (reference)                   | 1.0 (reference)                   |
| Vaccinated                        | 1,143 (1.11)  | 0.31                         | 0.84 (0.78 to 0.91) <sup>e)</sup> | 0.84 (0.77 to 0.91) <sup>e)</sup> |
| Medication use for hyperlipidemia |               |                              |                                   |                                   |
| No                                |               |                              |                                   |                                   |
| Unvaccinated                      | 7,785 (1.24)  | 1.90                         | 1.0 (reference)                   | 1.0 (reference)                   |
| Vaccinated                        | 6,027 (0.97)  | 1.63                         | 0.83 (0.80 to 0.86) <sup>e)</sup> | 0.82 (0.80 to 0.85) <sup>e)</sup> |
| Yes                               |               |                              |                                   |                                   |
| Unvaccinated                      | 1,391 (1.32)  | 0.34                         | 1.0 (reference)                   | 1.0 (reference)                   |
| Vaccinated                        | 1,170 (1.05)  | 0.32                         | 0.82 (0.75 to 0.88) <sup>e)</sup> | 0.81 (0.75 to 0.88) <sup>e)</sup> |

aHR, adjusted hazard ratio; CI, confidence interval.

<sup>a)</sup>Non-smoker indicates individuals who do not currently smoke.

<sup>b)</sup>Incidence rate expressed as per 1,000 person-years.

<sup>c)</sup>Models 1: adjusted for age (50–54, 55–59, 60–64, and ≥ 65 years) and sex.

<sup>d)</sup>Model 2: adjusted for age (50–54, 55–59, 60–64, and ≥ 65 years); sex; household income (low income, middle income, and high income); region of residence (urban and rural); Charlson comorbidity index (0, 1, and ≥ 2); obesity (underweight [ $< 18.5 \text{ kg/m}^2$ ], normal [ $18.5\text{--}22.9 \text{ kg/m}^2$ ], overweight [ $23.0\text{--}24.9 \text{ kg/m}^2$ ], and obese [ $\geq 25.0 \text{ kg/m}^2$ ]); blood pressure (systolic blood pressure  $< 140 \text{ mmHg}$  and diastolic blood pressure  $< 90 \text{ mmHg}$  and systolic blood pressure  $\geq 140 \text{ mmHg}$  or diastolic blood pressure  $\geq 90 \text{ mmHg}$ ); fasting blood glucose ( $< 100$  and  $\geq 100 \text{ mg/dL}$ ); glomerular filtration rate ( $< 60$ ,  $60\text{--}89$ , and  $\geq 90 \text{ mL/min/1.73 m}^2$ ); smoking status (non-, ex-, and current smoker); alcohol consumption (drinks;  $< 1$ ,  $1\text{--}2$ ,  $3\text{--}4$ , and  $\geq 5$  days per week); aerobic physical activity (sufficient and insufficient); and history of medication use for coronary artery disease, diabetes mellitus, dyslipidemia, and hypertension.

<sup>e)</sup>Significant differences ( $p < 0.05$ ).
